# Supplementary material for: Ebola virus-induced eye sequelae: a murine model for evaluating glycoprotein-targeting therapeutics
Source: PubMed Central journal article supplement — eBioMedicine. 2024 Jun 1;104:105170. doi: 10.1016/j.ebiom.2024.105170 (PMC11169960; doi:10.1016/j.ebiom.2024.105170), 2024-06-01
Supplement: mmc1.pdf [file mmc1.pdf]

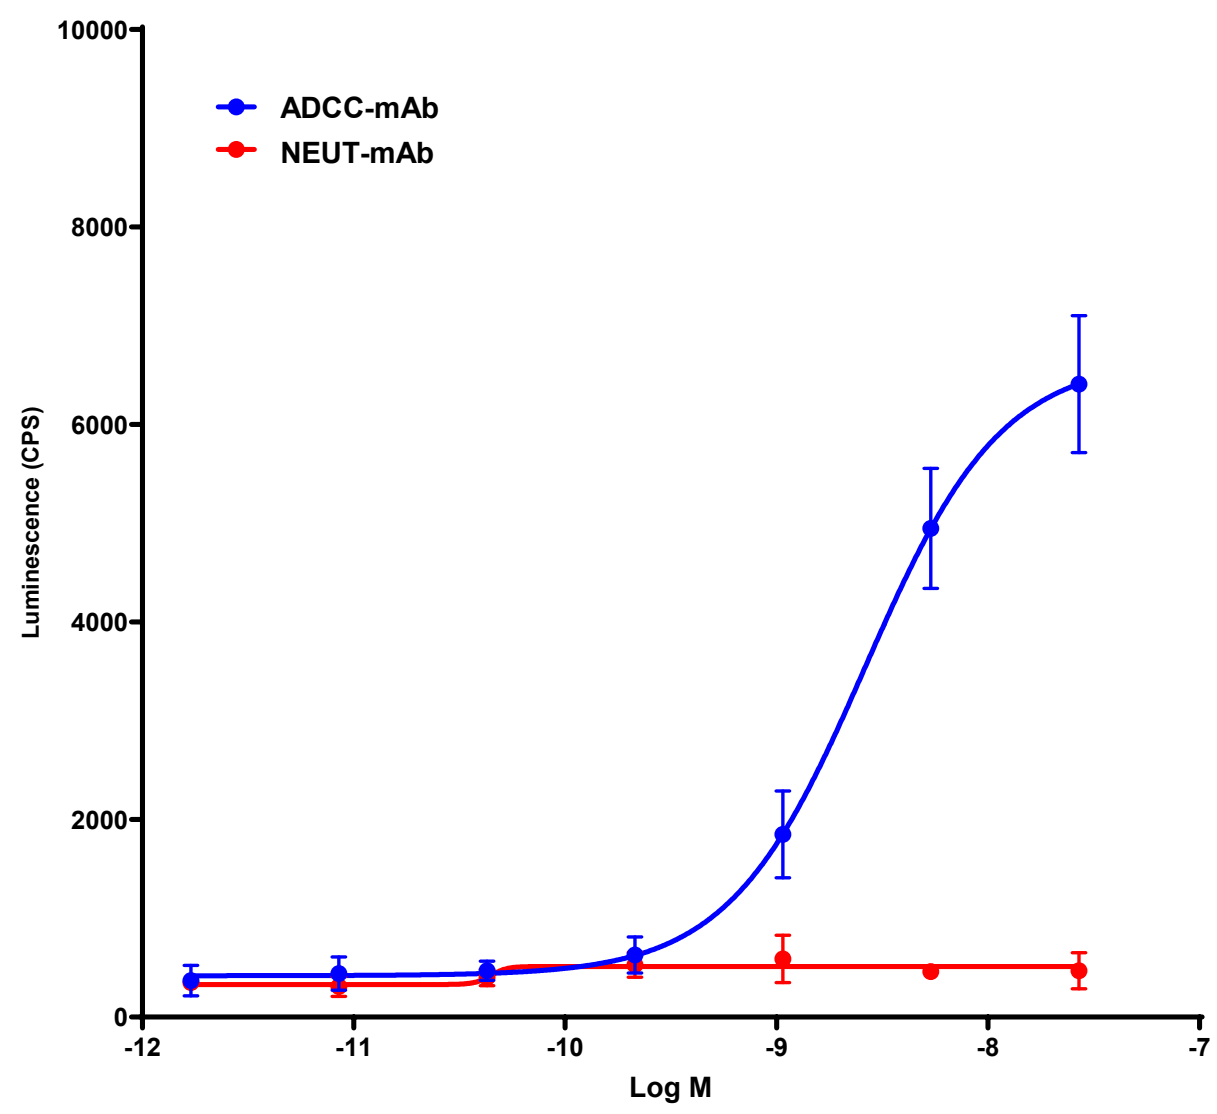

### Viral titers in serum

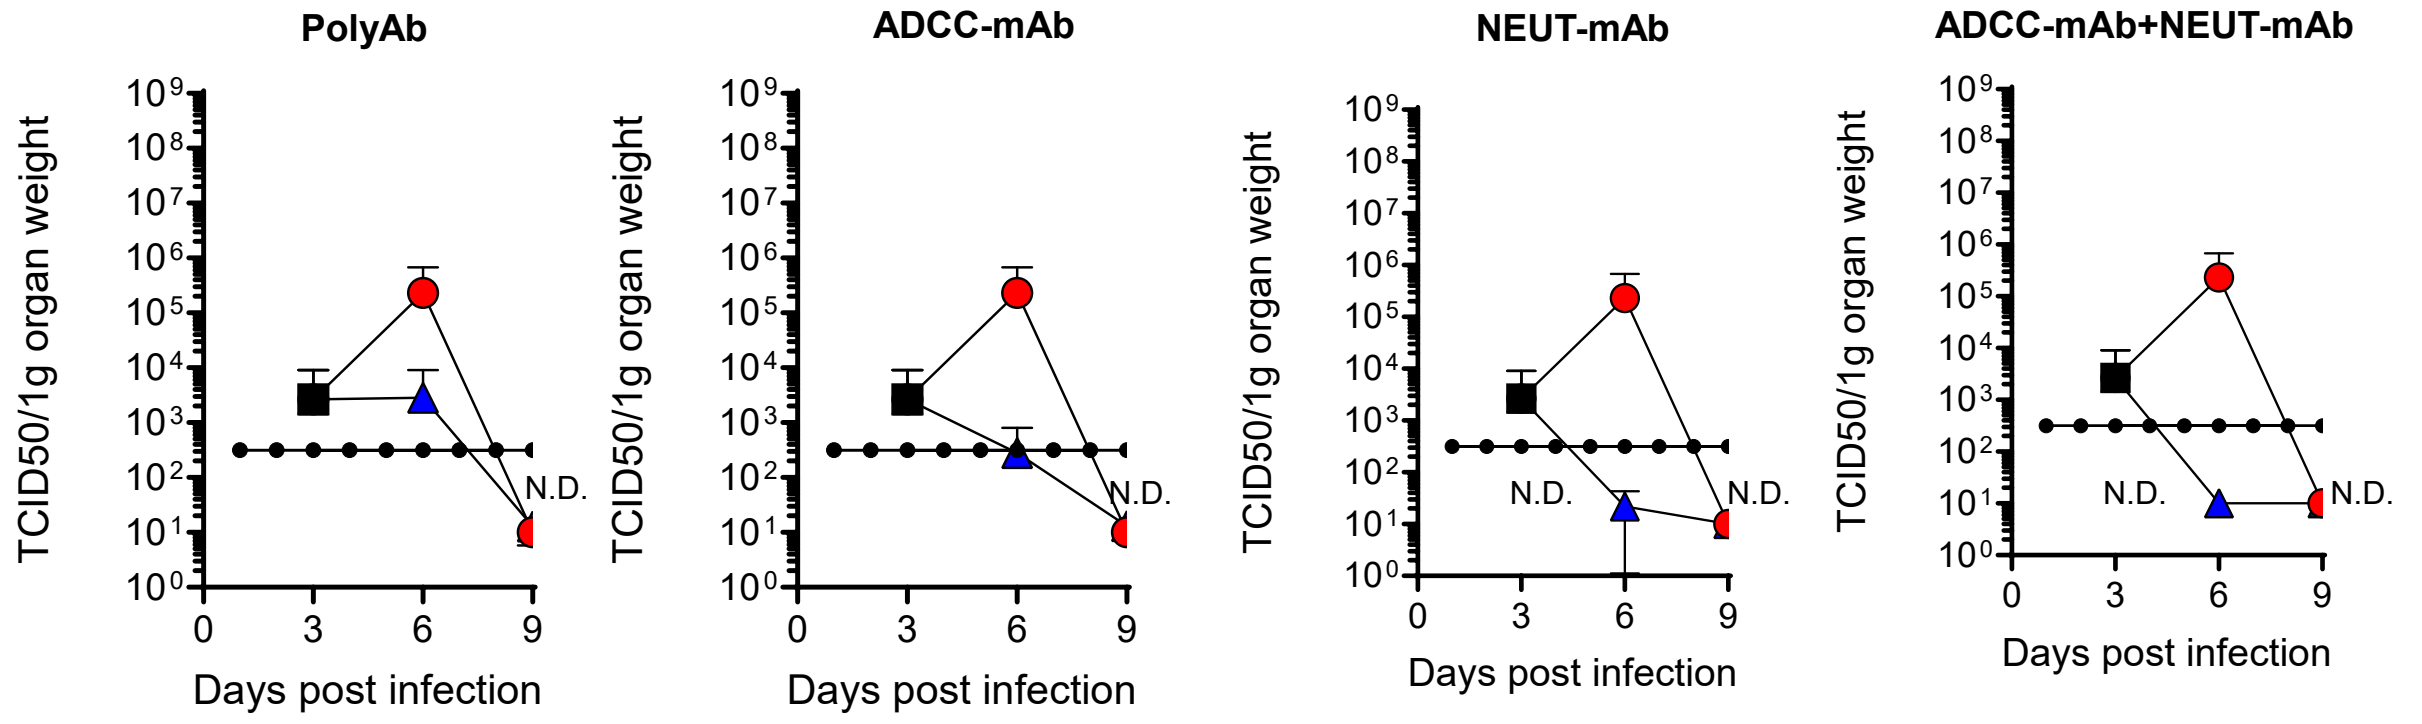

Red: VSV-EBOV+control  
Blue: VSV-EBOV+anti-EBOV-GP Ab

(a) % of CD45+ cells (in live cells)

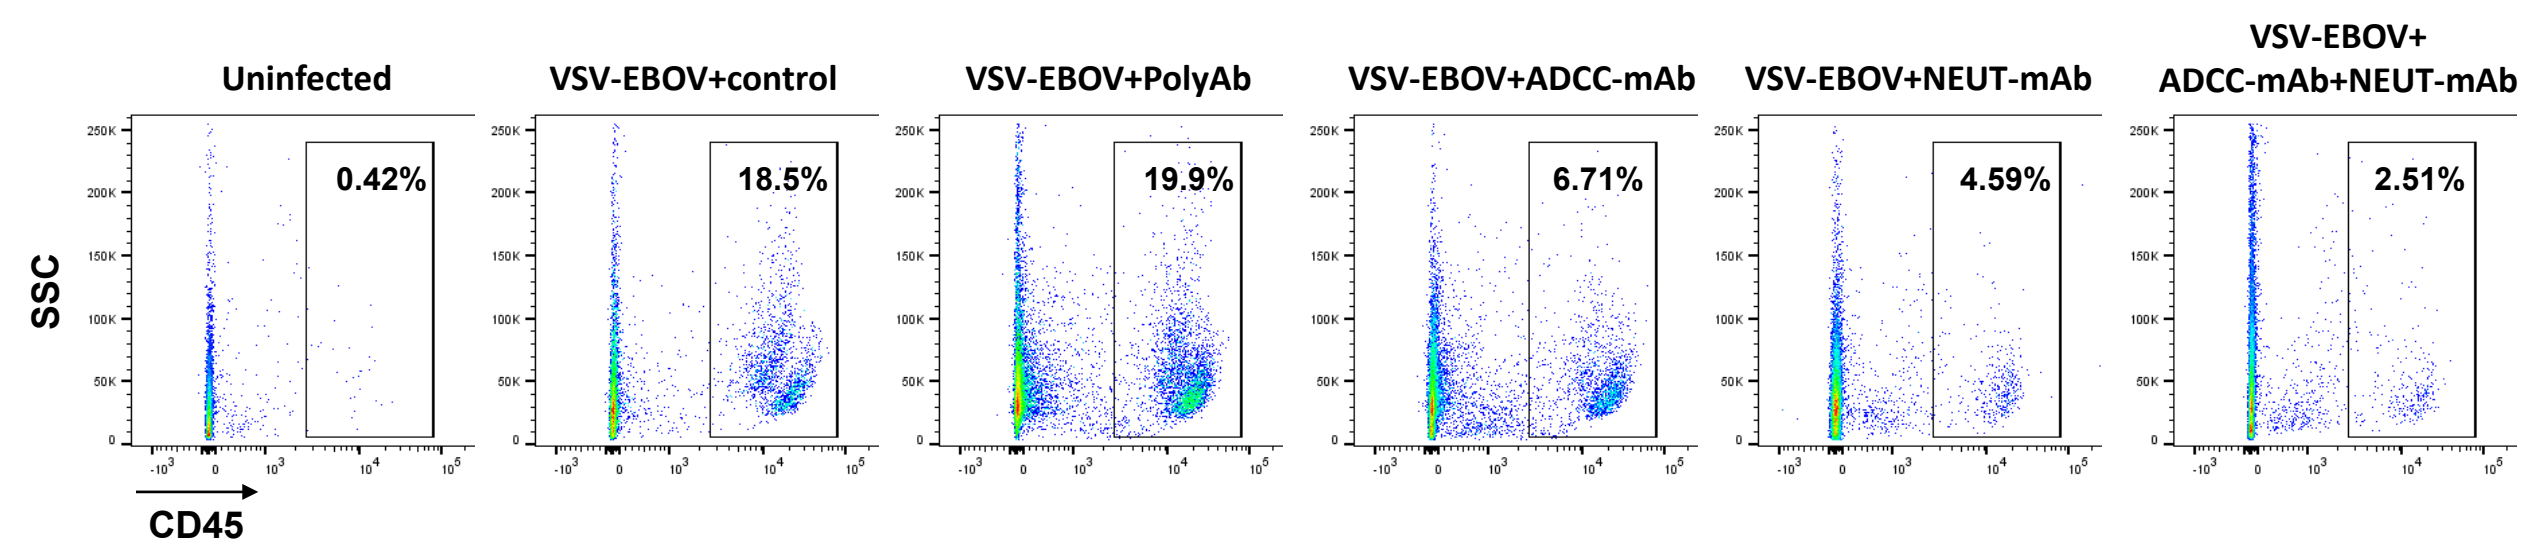

(b) % of CD3+ T cells (in CD45+ cells)

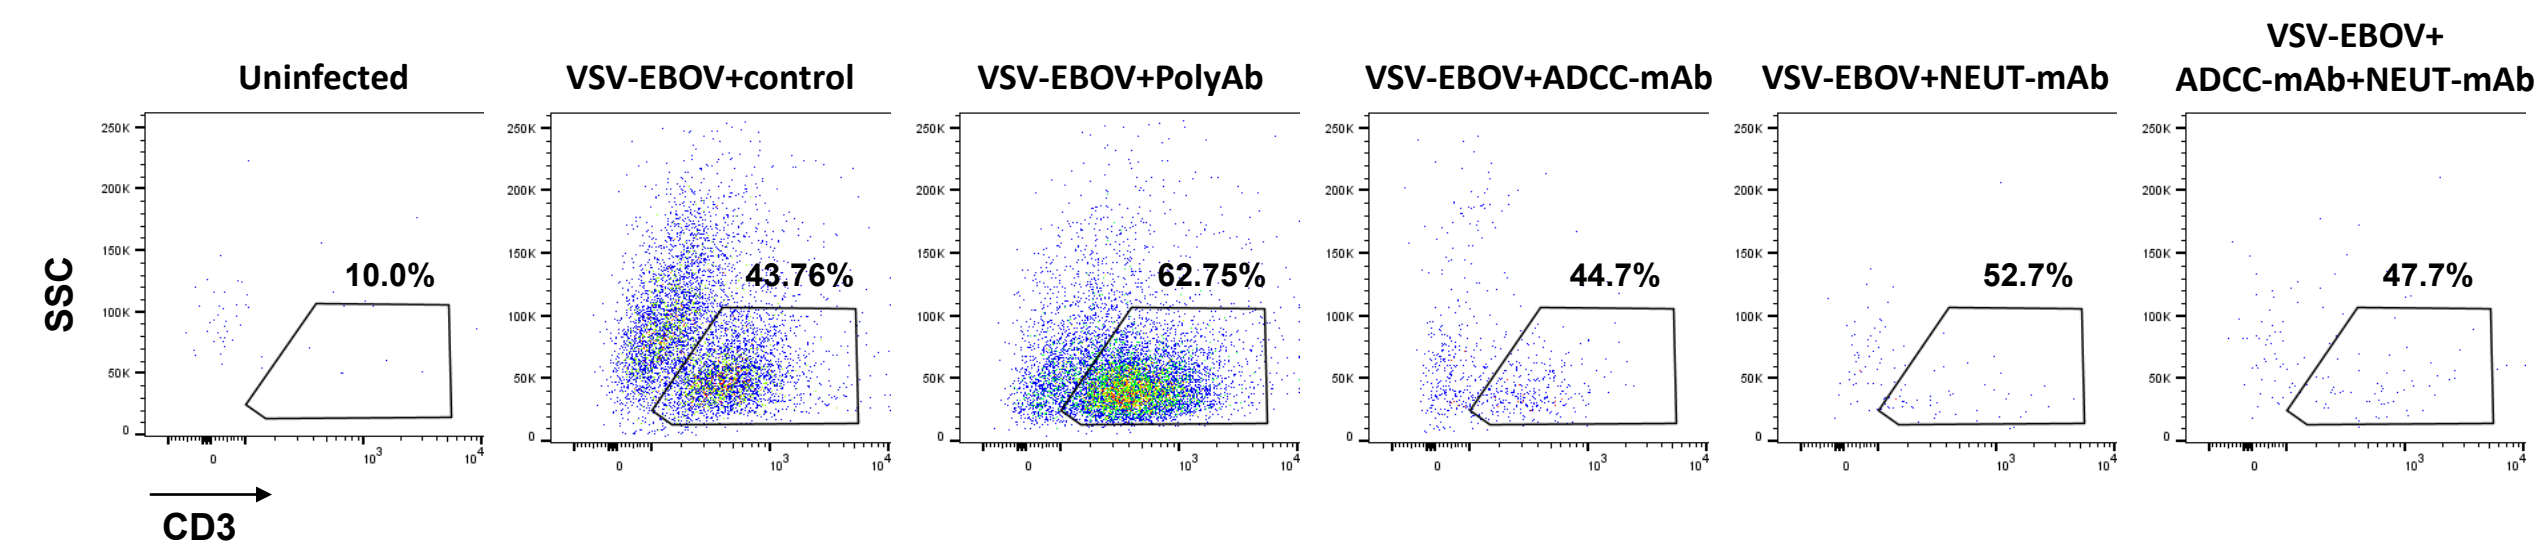

(c) % of CD4+ and CD8+ T cells (in CD3+ T cells)

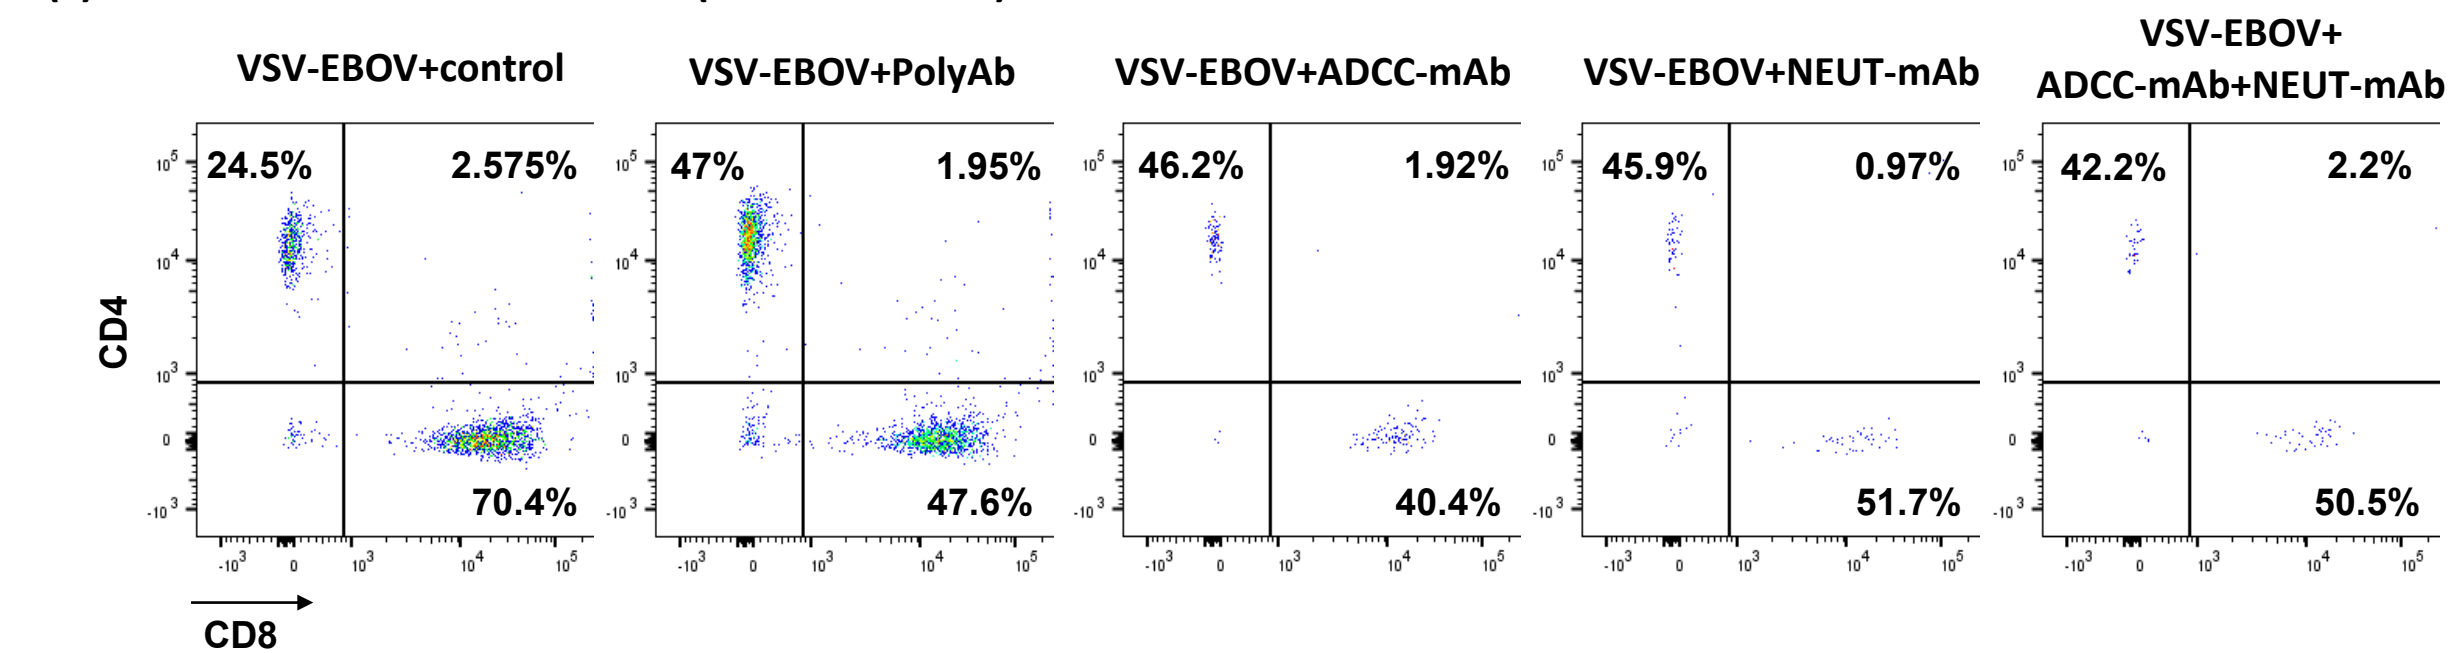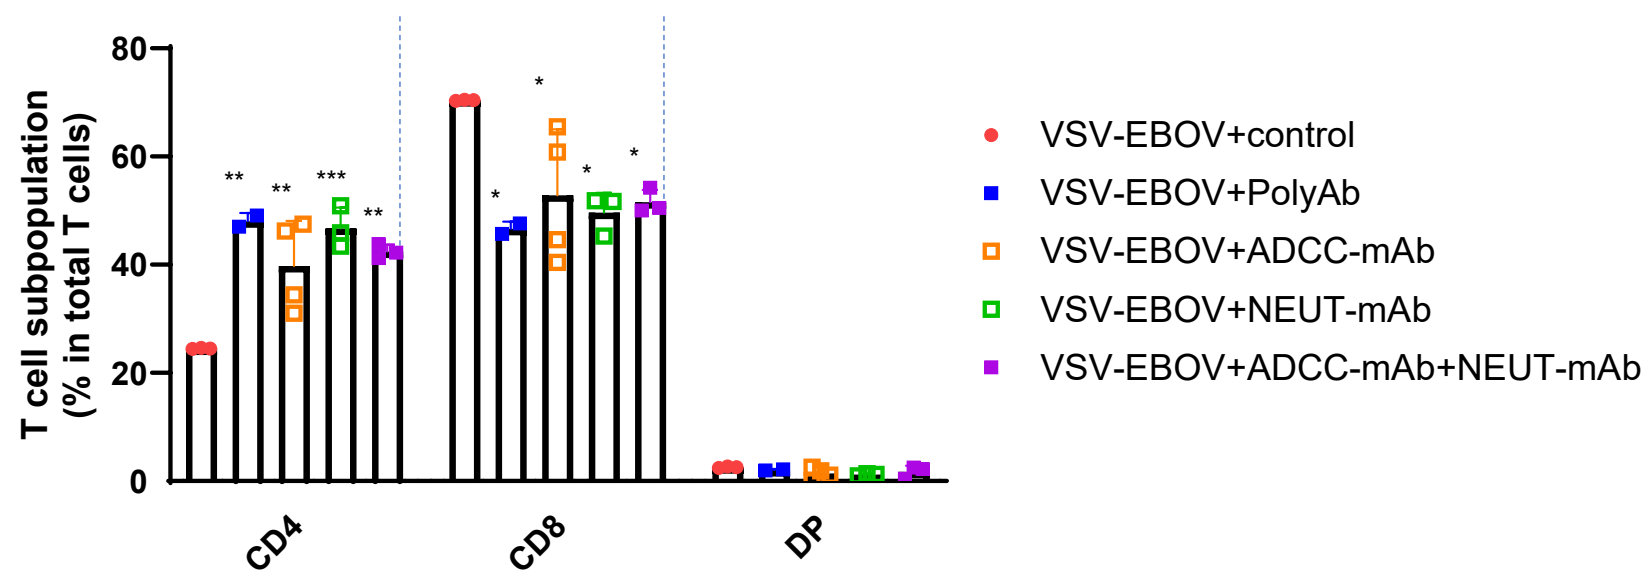

(d)

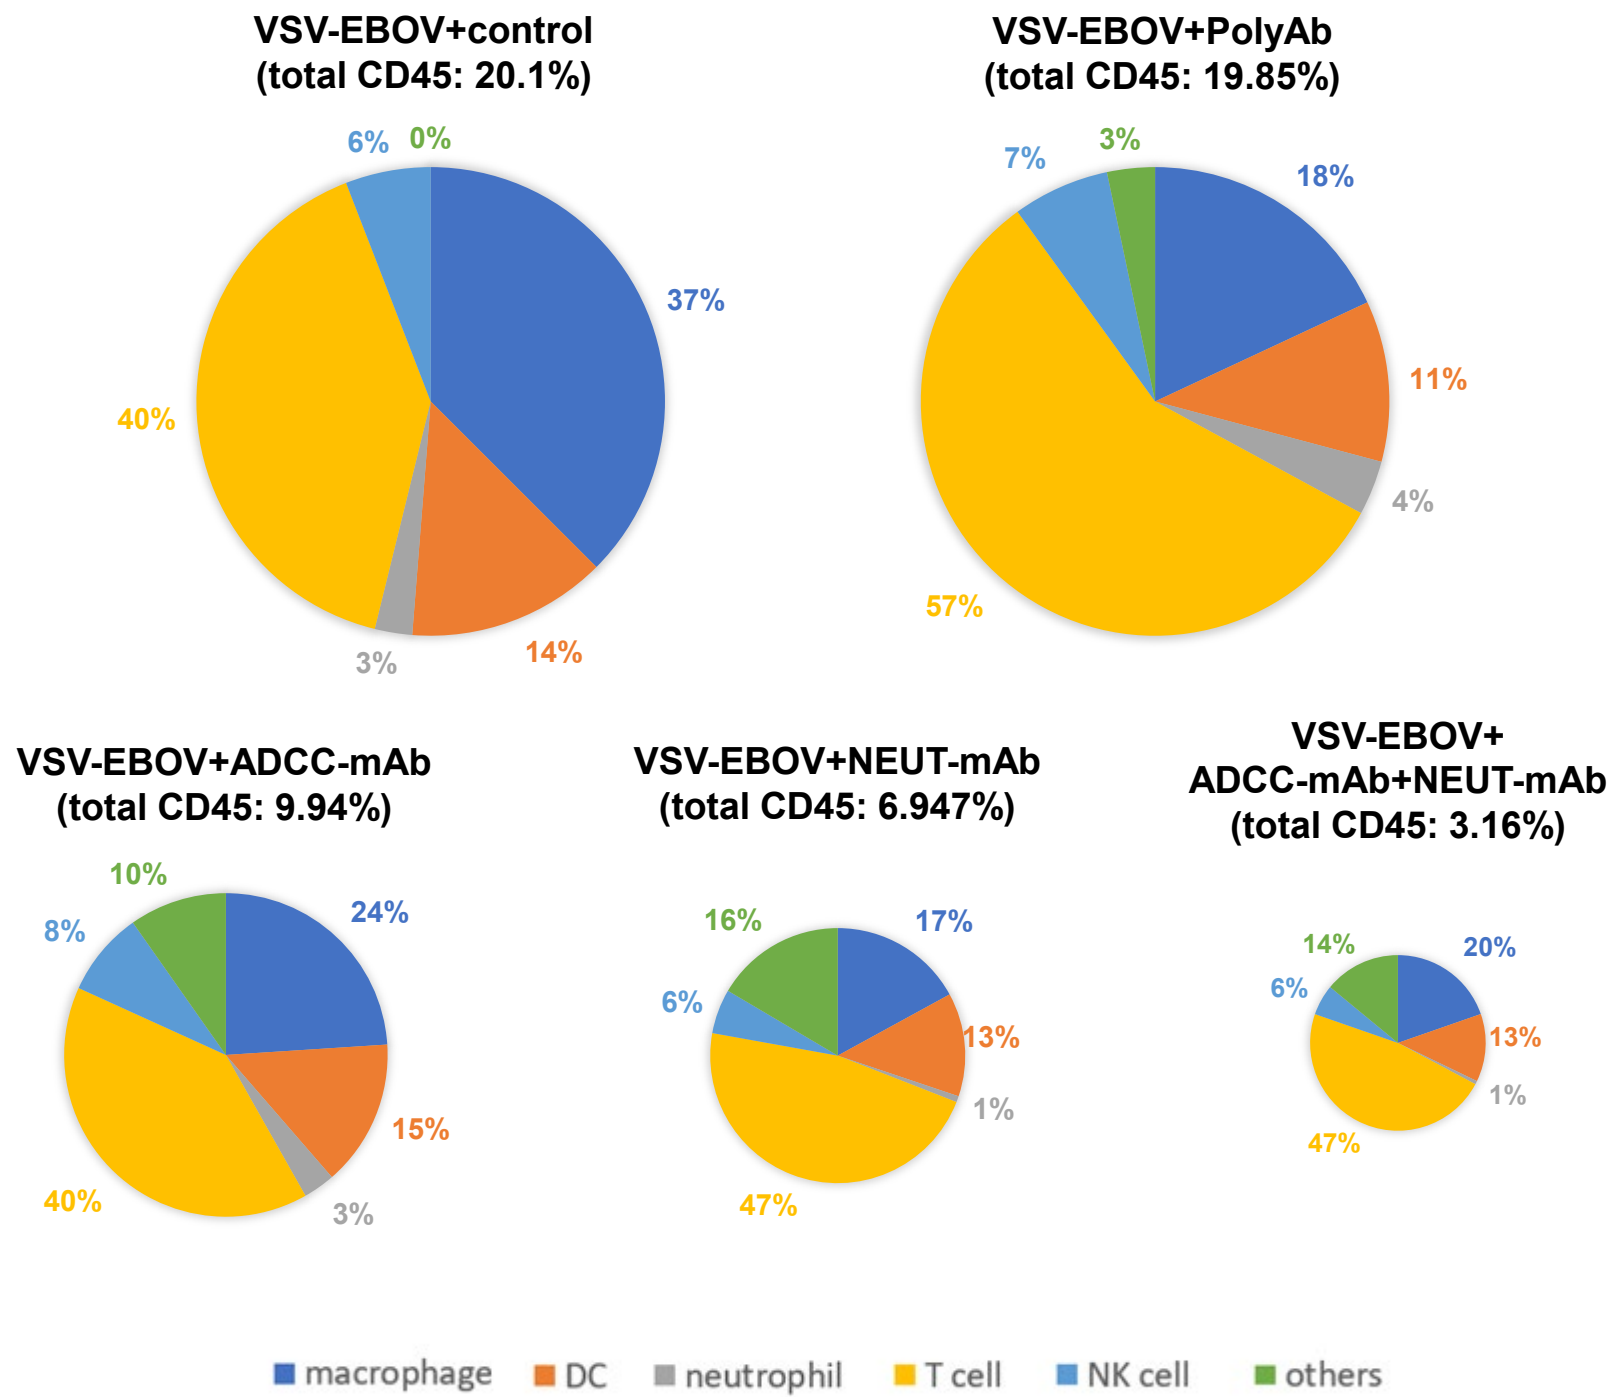

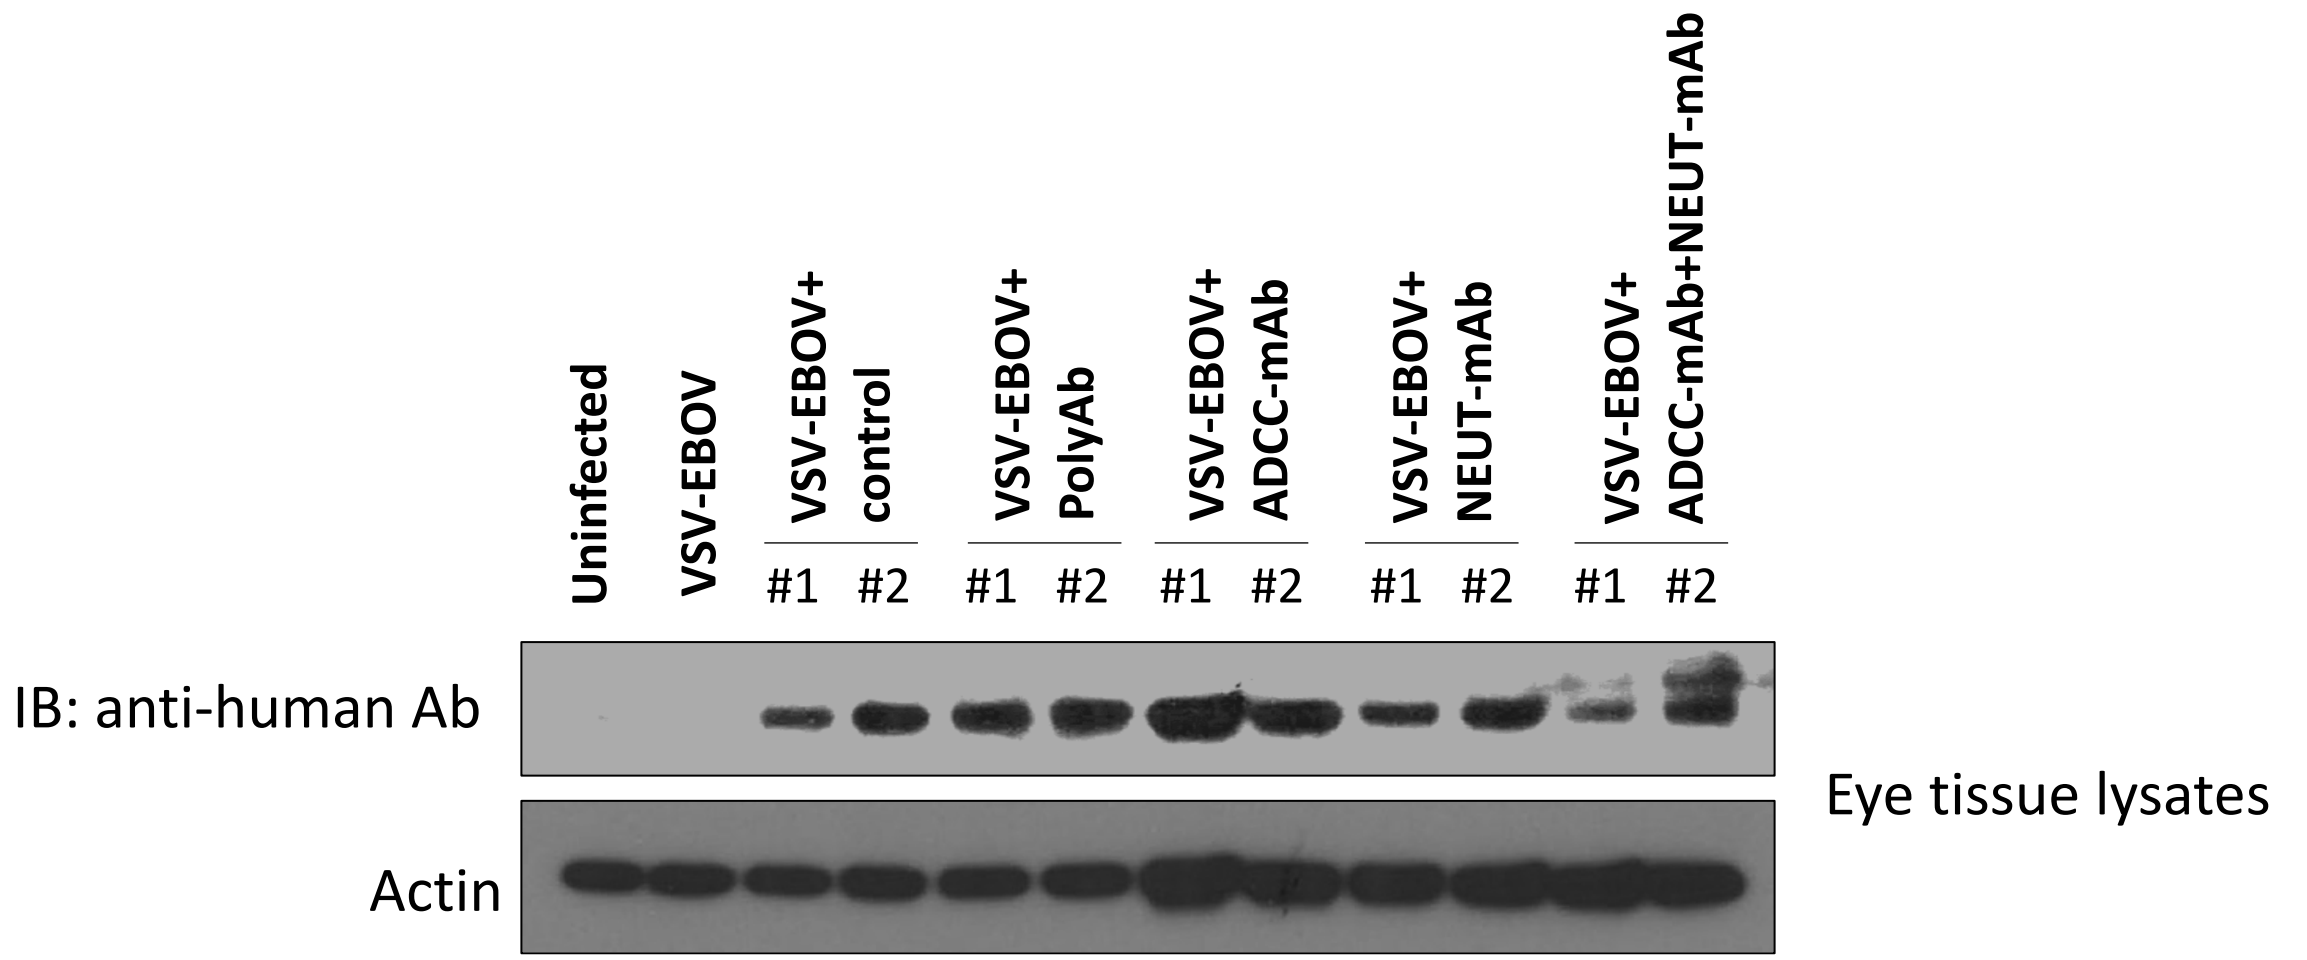

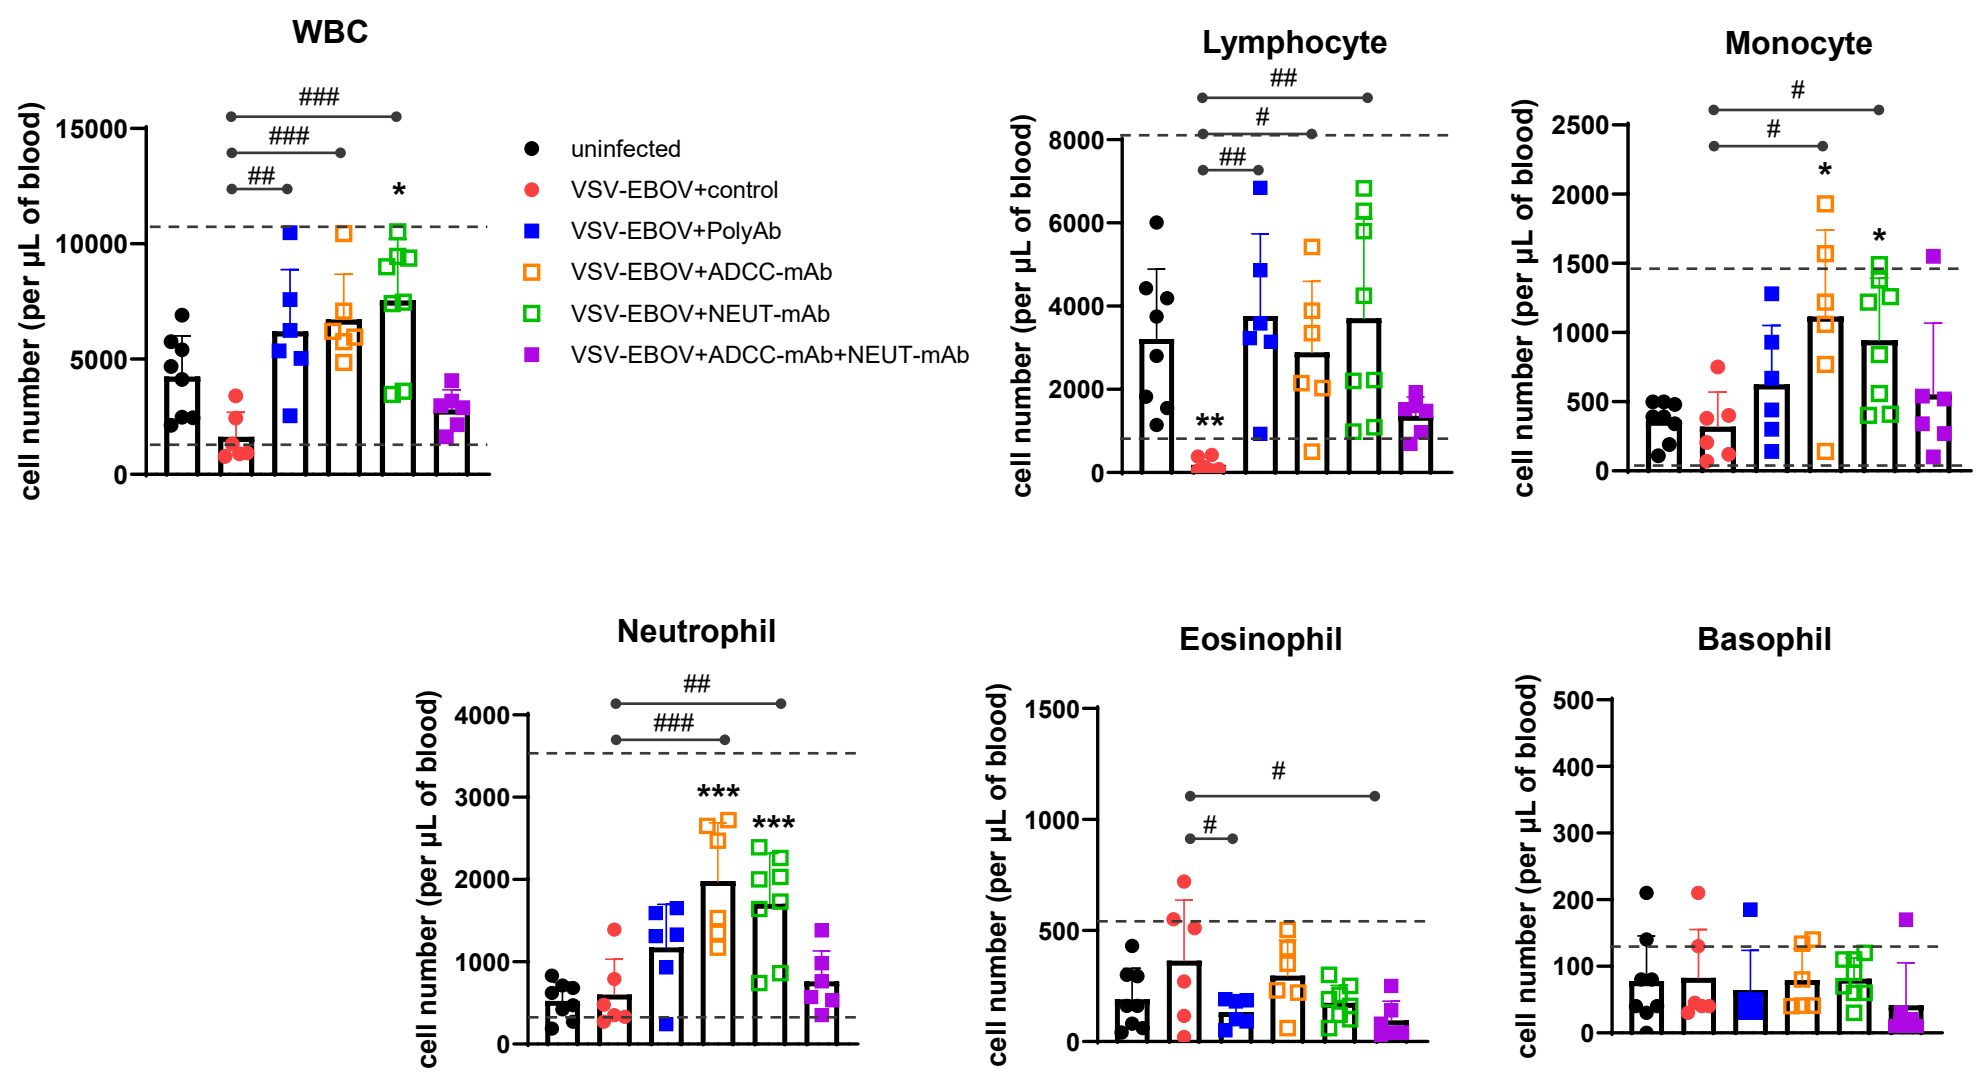

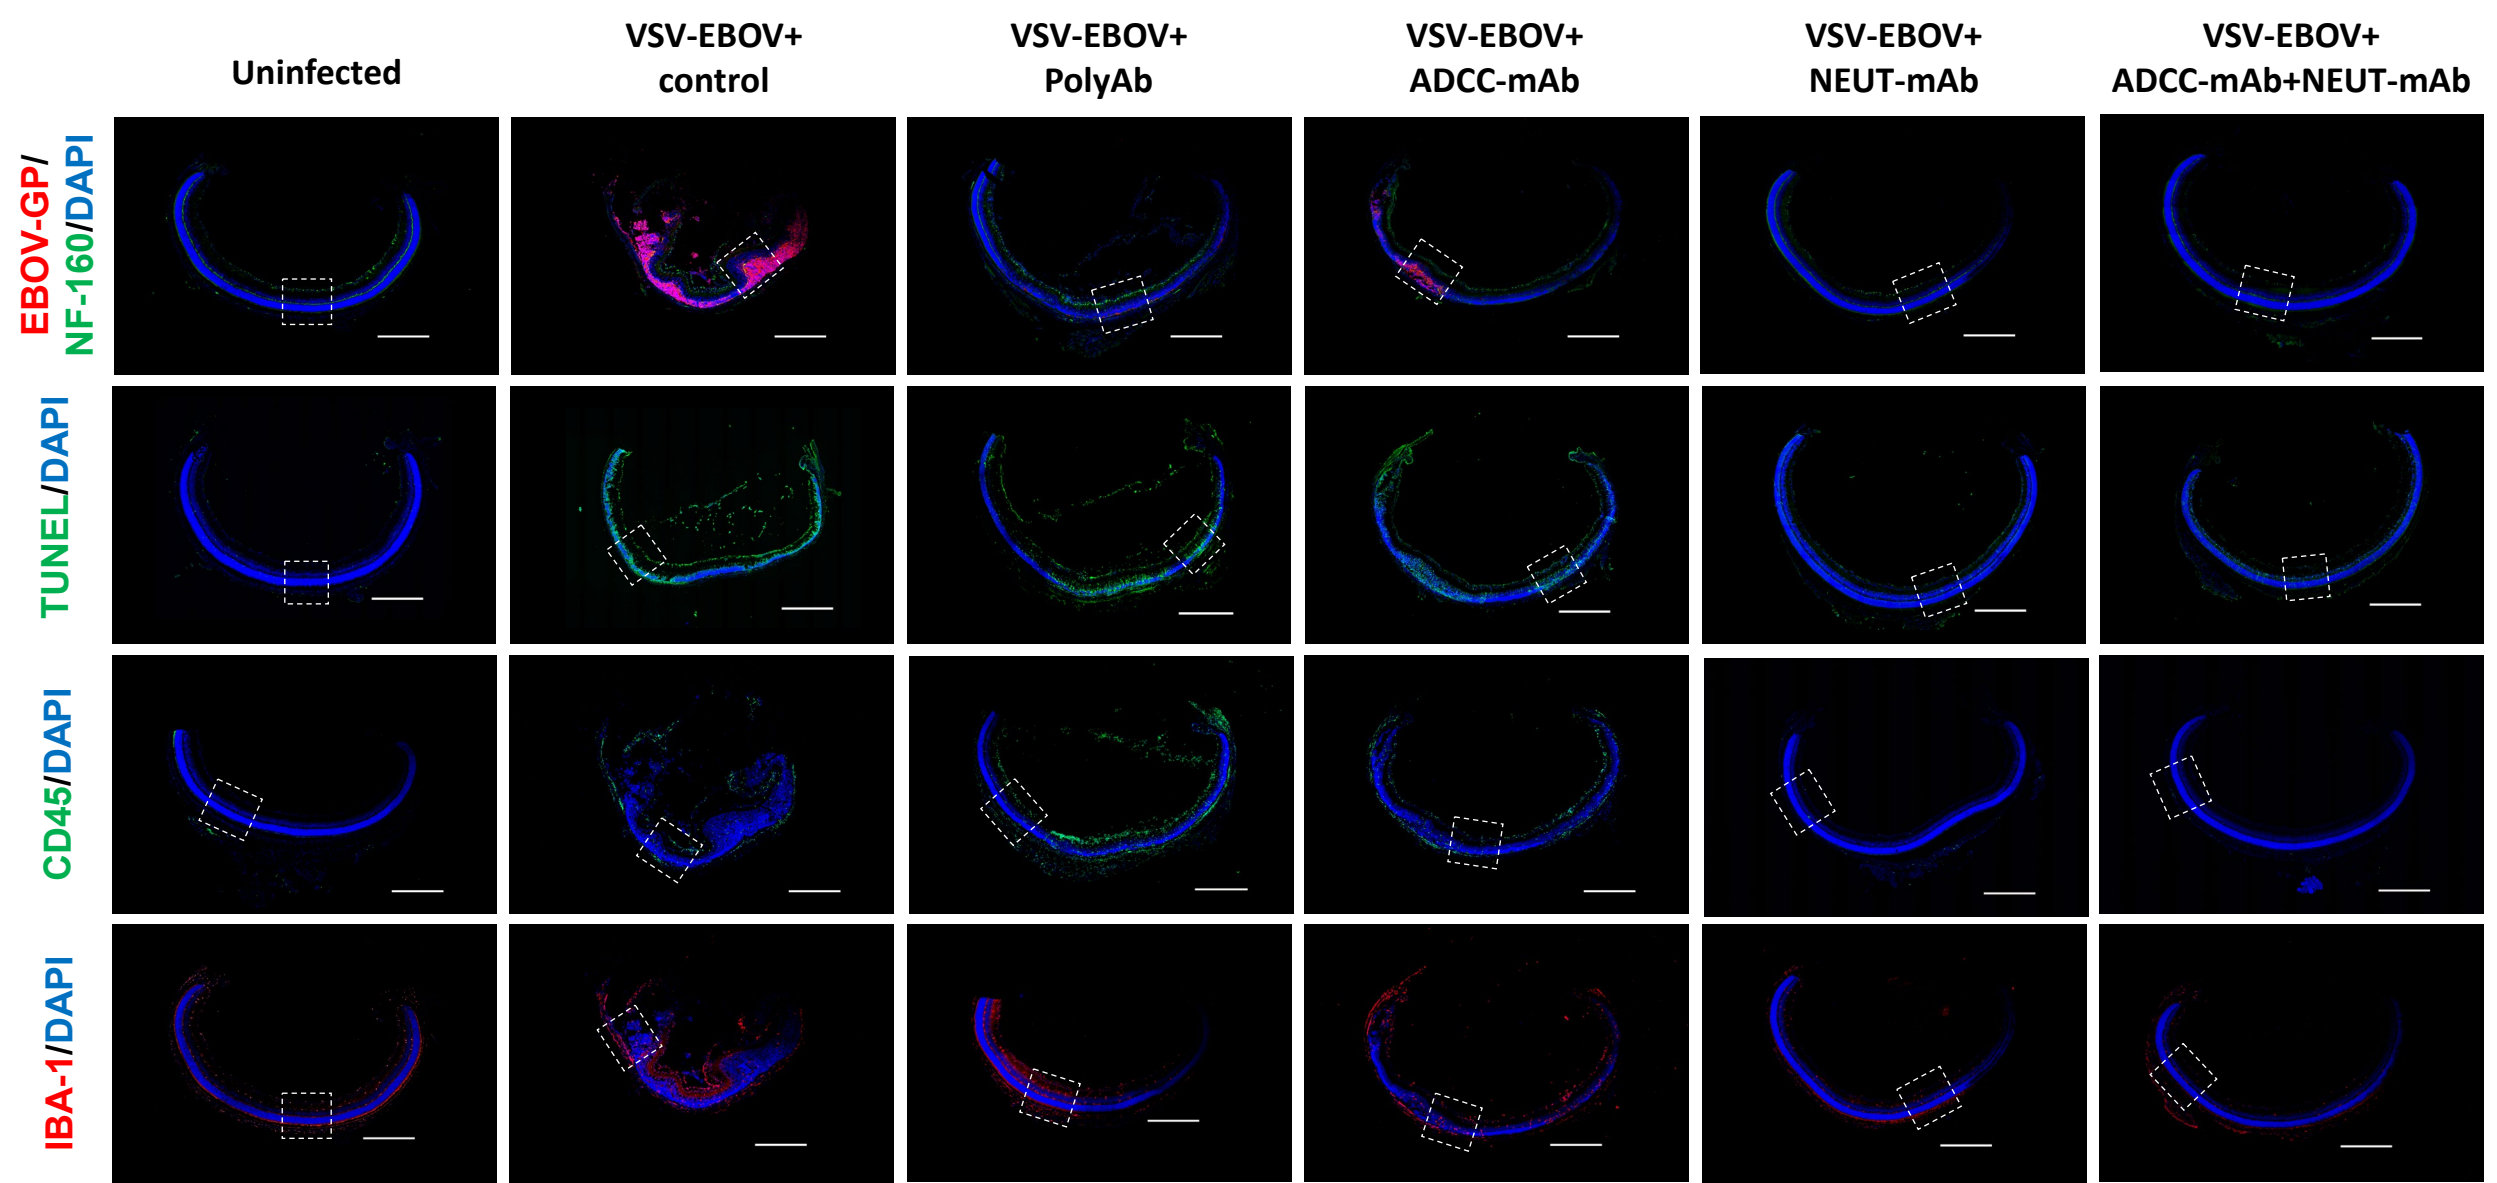

Supplementary Figure 6
