# Supplementary figures and images for: Ebola virus-induced eye sequelae: a murine model for evaluating glycoprotein-targeting therapeutics
Source: PubMed Central journal article supplement — eBioMedicine. 2024 Jun 1;104:105170. doi: 10.1016/j.ebiom.2024.105170 (PMC11169960; doi:10.1016/j.ebiom.2024.105170), 2024-06-01

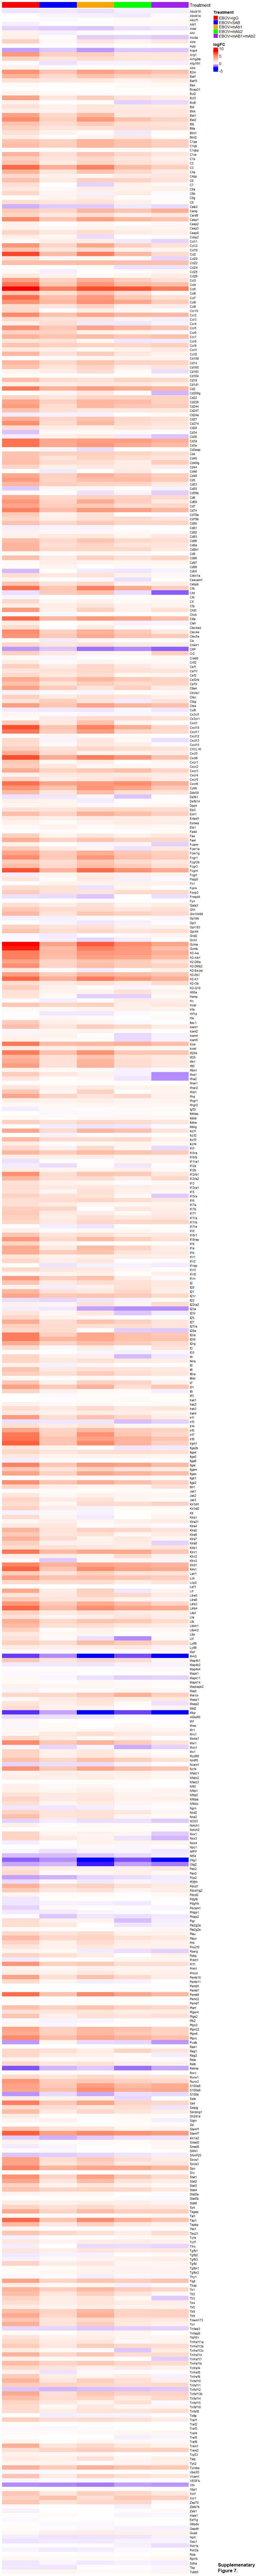

Supplementar  
Figure 7.

Supplement: mmc2.pdf [file mmc2.pdf]
